# Supplementary material for: The impact of drifting substorm-injected electrons on pulsating aurora initiation and intensification
Source: Frontiers journal article supplement (doi:10.3389/fspas.2024.1335562), 2024-03-01
Supplement: Table_1.XLSX [file Table_1.XLSX]

## Sheet: Sheet1
Date		Probe A Injection Times	33.0A	54.0A	80.0A	108.0A	143.0A	184.0A	226.0A	235.0A	346.0A	470.0A		Probe B Injection Times	32.0B	54.0B	75.0B	102.0B	132.0B	168.0B	208.0B	246.0B	354.0B	470.0B
2012-09-18
2013-05-01
2013-05-18
2013-08-28
2013-10-30					08:09:00	07:56:00	07:45:00	07:40:00								08:31:30	08:14:00	08:01:00	07:51:00	07:45:00
					07:16:00	07:00:00	06:47:00
2014-08-28			05:09:45	05:06:30	05:05:00	05:03:30	05:03:00								10:24:30	10:20:30	10:19:00	10:18:00
				05:17:00	05:15:15	05:13:30	05:12:00	05:09:45	05:09:00	05:09:00
2014-08-29			05:02:00	04:58:00	04:57:25	04:54:40	04:52:10								10:44:00	10:42:40	10:42:10	10:41:45	10:41:40
				05:21:00	05:17:00	05:13:30								1		05:01:00	04:58:00	04:55:00	04:53:00	04:50:30	04:49:00	04:48:00
		3		06:28:30	06:24:30	06:23:00	06:21:30	06:21:00						2			05:23:00	05:17:00	05:13:00	05:09:30	05:07:30
		4	07:33:00	07:21:00	07:16:30	07:09:30	07:06:45
2014-08-31			11:00:30	10:59:30	10:58:00	10:56:30	10:54:45	10:53:15							03:17:00	03:04:00	02:52:00
																11:02:00	11:01:00	11:00:00	10:59:15	10:58:00	10:57:30
2014-09-04			06:55:15	06:51:30	06:48:30
2014-09-24																	02:07:10	02:06:35	02:05:40
					03:05:00	03:02:00	03:01:00	02:58:00	02:56:00							03:12:00	03:10:00	03:08:30	03:07:15	03:06:30	03:06:00	03:05:40	03:05:00	03:04:00
					02:08:10	02:07:00	02:06:10
				04:56:00	04:56:00	04:53:00	04:50:00
																05:02:00	05:00:00	04:56:00	04:55:00
2014-09-30			03:33:00	03:27:00	03:23:00	03:20:45	03:19:30								03:22:15	03:19:00	03:15:00	03:13:00
					11:51:00	11:45:00	11:38:30	11:35:45	11:34:45	11:34:30							11:49:00	11:42:30	11:38:00	11:34:15	11:32:30	11:31:00
2014-10-20															09:19:00	09:18:30	09:18:00
																02:41:00	02:35:00	02:31:00	02:29:00	02:25:00
2014-12-12				08:15:30	08:15:15	08:15:15	08:15:15								04:38:13	04:33:43	04:30:28	04:27:13	04:24:09
					08:33:00	08:32:00	08:31:00	08:30:10	08:29:45	08:29:35					12:31:45	12:31:00	12:30:15	12:30:00
			12:57:00	12:51:00	12:49:00	12:46:00	12:42:30	12:40:00
2014-12-30			01:34:00	01:33:00	01:31:00	01:29:15	01:28:00									06:01:30	05:58:00	05:55:14.225000	05:53:36.822000	05:52:30
															13:45:30	13:45:15	13:45:15	13:45:15
2015-01-26				08:53:30	08:51:00	08:49:00	08:47:15
				09:12:00	09:06:30	09:04:00	09:01:45
			08:42:00	08:41:00	08:40:00	08:39:30	08:39:00
2015-03-08
2015-03-16			06:46:00	06:45:30	06:45:00	06:44:50	06:44:50
					08:14:00	07:54:00	07:38:00	07:28:00
2015-03-17
2015-03-19				09:21:00	09:19:00	09:14:00	09:10:45									05:34:00	05:28:00	05:26:00	05:21:30
			07:08:40	07:08:40	07:08:40	07:08:40
2015-03-25					08:15:00	07:59:00	07:47:00								04:24:00	03:24:00	03:15:00	02:58:00
			06:44:00	06:43:45	06:43:15
2015-04-15
2015-04-18
2015-04-21			04:51:30	04:51:00	04:50:30	04:50:15									04:56:40	04:56:40	04:56:40	04:56:40	04:56:40
2015-05-12
1900-01-01
